# Supplementary material for: Density functional theory simulations of the structure, stability and dynamics of iron sulphide clusters in water
Source: Royal Society of Chemistry journal article supplement (doi:10.1039/c3cp43560a), 2013-01-01
Supplement: c3cp43560a.pdf [file c3cp43560a.pdf]

Supplementary Information

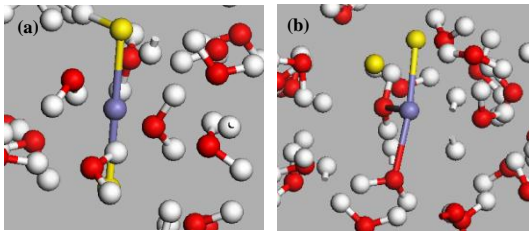

Figure 1: Car-Parrinello molecular dynamics (MD) simulations of  $\text{FeS}_2$  in water: (a) configuration at  $t = 0$  ps (b) final configuration at  $t = 2$  ps.

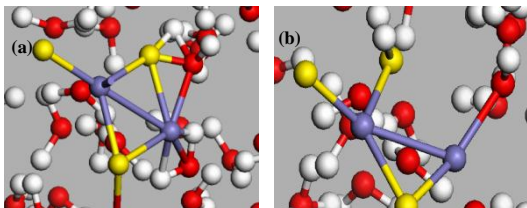

Figure 2: Car-Parrinello MD simulations of  $\text{Fe}_2\text{S}_3$  in water: (a) intermediate configuration during simulation and (b) final configuration at  $t = 2$  ps.

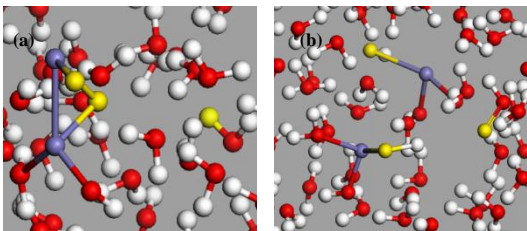

Figure 3: Car-Parrinello MD simulations of  $\text{Fe}_2\text{S}_2$  in water: (a) intermediate configuration during simulation and (b) final configuration at  $t = 2$  ps.

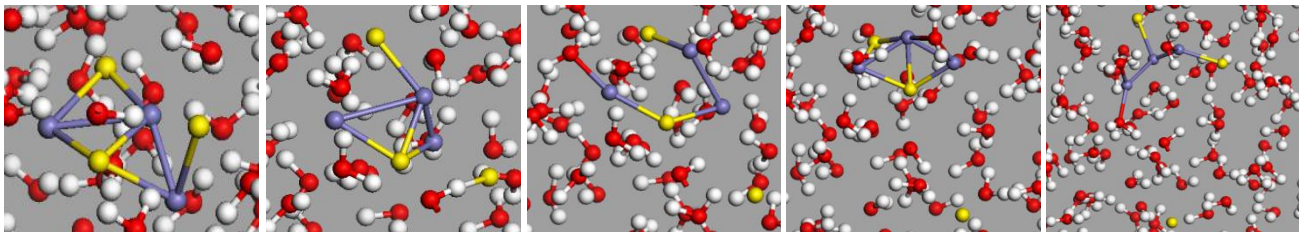

Figure 4: Snapshots taken during Car-Parrinello MD simulation of  $\text{Fe}_3\text{S}_3$  in water.

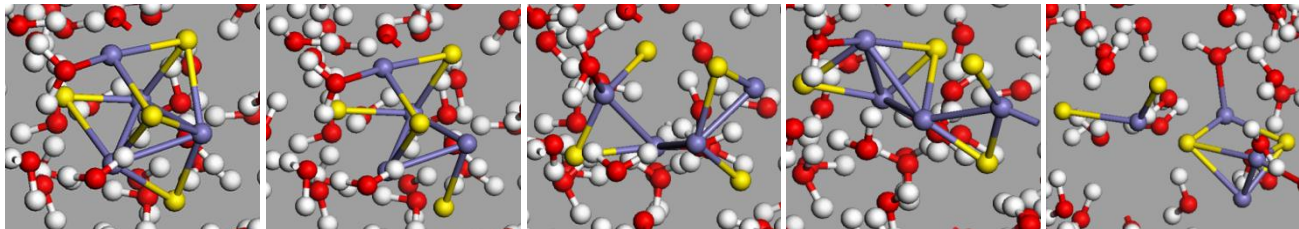

Figure 5: Snapshots taken during Car-Parrinello MD simulation of  $\text{Fe}_4\text{S}_4$  in water.
